# Supplementary material
Source: publisher figshare collection journal article supplement (https://acs.figshare.com/ndownloader/files/3738436)
Supplement: Supplementary file 1 [file 3738436]

## Supporting information

### Tacrine – Trolox Hybrids: A Novel Class of Centrally Active, Non-Hepatotoxic

### Multi-Target-Directed Ligands Exerting Anticholinesterase and Antioxidant

### Activities with Low *In Vivo* Toxicity

Eugenie Nepovimova<sup>a,b,c,§</sup>, Jan Korabecny<sup>a,b,d,§</sup>, Rafael Dolezal<sup>a,e</sup>, Katerina Babkova<sup>a,b</sup>, Ales Ondrejicek<sup>g</sup>, Daniel Jun<sup>a,b</sup>, Vendula Sepsova<sup>a,b</sup>, Anna Horova<sup>a,b</sup>, Martina Hrabínova<sup>a,b</sup>, Ondrej Soukup<sup>a,d</sup>, Neslihan Bukum<sup>a,f</sup>, Petr Jost<sup>a,b</sup>, Lubica Muckova<sup>b</sup>, Jiri Kassa<sup>b</sup>, David Malinak<sup>a,c</sup>, Martin Andrs<sup>a,b</sup>, and Kamil Kuca<sup>a,e,\*</sup>

<sup>a</sup> Biomedical Research Center, University Hospital Hradec Kralove, Sokolska 581, 500 05 Hradec Kralove, Czech Republic.

<sup>b</sup> Department of Toxicology and Military Pharmacy, Faculty of Military Health Sciences, University of Defence, Trebesska 1575, 500 01 Hradec Kralove, Czech Republic.

<sup>c</sup> Department of Intensive Medicine and Forensic Studies; Department of Physiology and Pathophysiology, Faculty of Medicine, University of Ostrava, Syllabova 19, 703 00 Ostrava, Czech Republic.

<sup>d</sup> National Institute of Mental Health, Topolova 748, 250 67 Klecany, Czech Republic.

<sup>e</sup> Center for Basic and Applied Research, Faculty of Informatics and Management, University of Hradec Kralove, Rokitanskeho 62, 500 03 Hradec Kralove, Czech Republic.

<sup>f</sup> Department of Chemistry, Faculty of Science, University of Hradec Kralove, Rokitanskeho 62, 500 03 Hradec Kralove, Czech Republic.

<sup>g</sup> Department of Pharmaceutical Chemistry and Drug Control, Faculty of Pharmacy in Hradec Kralove, Charles University in Prague, Heyrovského 1203, 500 05 Hradec Kralove, Czech Republic.

<sup>§</sup> E.N. and J.K. contributed equally.

## Contents of Supporting information

|                                                                                                                                         |     |
|-----------------------------------------------------------------------------------------------------------------------------------------|-----|
| <b>Table S1.</b> Permeability results from PAMPA-BBB assay for tacrine – trolox hybrids <b>7a-u</b> and reference compounds <b>1-4</b>  | S3  |
| <b>Microsomal <i>In Vitro</i> Metabolism and Stability Analysis:</b><br>Materials and Instrumentation                                   | S3  |
| <b>Figure S1.</b> UV-chromatogram of compound <b>7u</b> .                                                                               | S5  |
| <b>Figure S2.</b> Experimental MS/MS spectrum of the parent compound <b>7u</b> and suggested chemical structures of the main fragments. | S5  |
| <b>Figure S3.</b> Proposed structure of metabolite <b>M1</b> and molecular fragments which were found in MS/MS spectra.                 | S6  |
| <b>Figure S4.</b> Proposed structure of metabolite <b>M1</b> and further molecular fragments which were found in MS/MS spectra.         | S7  |
| <b>Figure S5.</b> Proposed structure of metabolite <b>M2</b> and molecular fragments which were found in MS/MS spectra.                 | S8  |
| <b>Figure S6.</b> Proposed structure of metabolite <b>M2</b> and further molecular fragments which were found in MS/MS spectra.         | S9  |
| <b>Figure S7.</b> Proposed structure of metabolite <b>M3</b> and molecular fragments which were found in MS/MS spectra.                 | S10 |
| <b>Figure S8.</b> Proposed structure of metabolite <b>M4</b> and molecular fragments which were found in MS/MS spectra.                 | S11 |

**Table S1.** Permeability results from PAMPA-BBB assay for tacrine – trolox hybrids **7a-u** and reference compounds **1-4**

| Compound                                  | $P_e$ ( $10^{-6}$ cm.s $^{-1}$ ) <sup>a</sup> |
|-------------------------------------------|-----------------------------------------------|
| <b>7a</b>                                 | 2.8                                           |
| <b>7b</b>                                 | 3.4                                           |
| <b>7c</b>                                 | 3.1                                           |
| <b>7d</b>                                 | 3.0                                           |
| <b>7e</b>                                 | 2.9                                           |
| <b>7f</b>                                 | 0.8                                           |
| <b>7g</b>                                 | 3.3                                           |
| <b>7h</b>                                 | 4.4                                           |
| <b>7i</b>                                 | 2.2                                           |
| <b>7j</b>                                 | 1.8                                           |
| <b>7k</b>                                 | 1.5                                           |
| <b>7l</b>                                 | 3.3                                           |
| <b>7m</b>                                 | 3.0                                           |
| <b>7n</b>                                 | 1.3                                           |
| <b>7o</b>                                 | 3.4                                           |
| <b>7p</b>                                 | 2.4                                           |
| <b>7q</b>                                 | 2.1                                           |
| <b>7r</b>                                 | 3.0                                           |
| <b>7s</b>                                 | 3.1                                           |
| <b>7t</b>                                 | 2.3                                           |
| <b>7u</b>                                 | 5.0                                           |
| <b>Tacrine</b>                            | 4.1                                           |
| <b>7-Methoxytacrine</b>                   | 4.2                                           |
| <b>6-Chlorotacrine</b>                    | 5.0                                           |
| <b>Trolox</b>                             | 0.5                                           |
| <b>Donepezil</b><br>(positive control)    | 5.9                                           |
| <b>Theophylline</b><br>(negative control) | 0.4                                           |

<sup>a</sup> Results are expressed as the mean of at least four experiments.

## Microsomal *In Vitro* Metabolism and Stability Analysis

### Materials

For LC-MS/MS analyses, acetonitrile (Sigma Aldrich, product No.: 34967), formic acid (Sigma Aldrich, product No.: 34860), both of LC-MS grade purity, and ultrapure water of ASTM I type (resistance 18.2 MΩ.cm at 25°C) prepared by Barnstead Smart2Pure 3 UV/UF apparatus (ThermoFisher Scientific, Bremen, Germany) were used for preparation of mobile phases. A sample stock solution for microsomal metabolism assay was prepared by dissolving of the tested compound in dimethyl sulfoxide (Sigma Aldrich, product No.: D8418). Un-calibrated purity of the target compound was evaluated by LC analysis at  $\lambda = 254\text{nm}$  (98%). Calibration series was prepared by

diluting a stock solution of the assayed compound in methanol of LC-MS grade purity (Sigma Aldrich, product No.: 34966).

Pooled human liver microsomes (HLM, from 200 adult donors of mixed gender) in concentration 20.0 mg/mL for the metabolism study were obtained from Tebu Bio Sas (France, 1 mL, product No.: 098H2620). HLM samples contained cytochrome P450 (0.478 nmol/mg protein), cytochrome b<sub>5</sub> (0.369 nmol/mg protein) and NADPH-cytochrome *c* reductase (162 ± 7 nmol/mg protein/min) suspended in 250mM sucrose. After delivery, HLM samples were melted at 4°C, quickly aliquoted to 25 µL and stored at – 80°C. RapidStart NADPH Regenerating System, containing 0.5 mL of 100mM NADP, 0.5 mL of 500mM glucose-6-phosphate, and 0.5 ml of 100 units/mL glucose-6-phosphate dehydrogenase in 20mM potassium phosphate buffer (pH = 7.4) was also purchased from Tebu Bio Sas (France, 1.5 mL, product No.: 098K5000). 1.5 mL of the original RapidStart solution was, according to the supplier instructions, mixed with 3.5 mL ultrapure water, vortexed for 30 s, distributed to 50 µL aliquotes and stored at – 80°C.

### **Instrumentation**

The metabolic study of the tested compound was performed using Dionex UltiMate 3000 analytical LC-MS system coupled with Q Exactive Plus hybrid quadrupole-orbitrap spectrometer (both produced by ThermoFisher Scientific, Bremen, Germany). The LC-MS system consisted of a binary pump HPG-3400RS connected to a vacuum degasser, a heated column compartment TCC-3000, an autosampler WTS-3000 equipped with a 25 µL loop and a VWD-3000 ultraviolet detector. A Waters Atlantis dC18 100Å (1 x 150mm/3µm) column was used as stationary phase. The analytical column was protected against mechanical particles by an in-line filter (Vici Jour) with a frit of 0.5 µm pores. Water (MFA) and acetonitrile (MFB) used for analytical purposes were acidified with 0.1% (v/v) of formic acid. Ions for mass spectrometry (MS) were generated by heated electro-spray ionization source (HESI) working in positive mode with the following settings: sheath gas flow rate 22, aux gas flow rate 2, sweep gas flow rate 0, spray voltage 3.0 kV, capillary temperature 250°C, aux gas temperature 250°C, S-lens RF level 50, microscans 1, maximal injection time 35 ms, normalized collision energy 35, resolution in full-scan 140 000, resolution in all-ions-fragmentation (AIF) 140 000. The wide-range multiple reaction monitoring (MRM) analyses registered ions within m/z range 100 – 1500. To increase the accuracy of HRMS, internal lock-mass calibration was exploited using polysiloxane traces of m/z = 445.12003 ([M+H]<sup>+</sup>, [C<sub>2</sub>H<sub>6</sub>SiO]<sub>6</sub>) present in mobile phases. The chromatograms and mass spectra were processed in Chromeleon 6.80 and Xcalibur 3.0.63 software, respectively. For metabolites and MS/MS fragments predictions Mass Frontier 7.0 and Networks 1.3 SP3 programs were utilized.

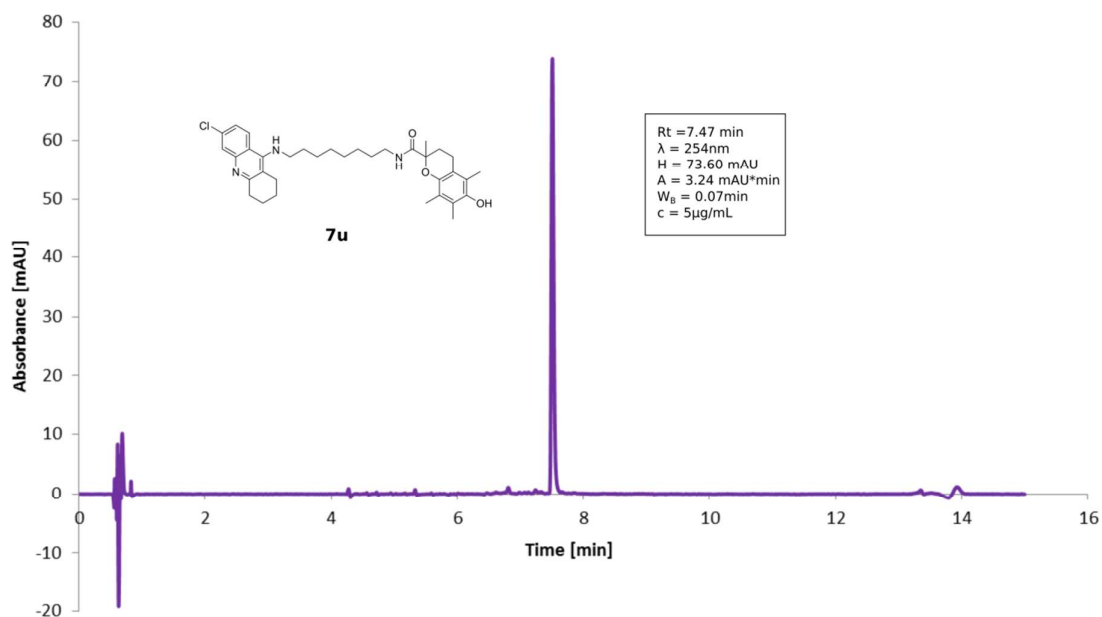

**Figure S1.** UV-chromatogram of compound **7u** obtained for concentration 5 µg/mL detected at  $\lambda = 254$  nm. Within the LC analysis a linear gradient elution by water and acetonitrile was used.

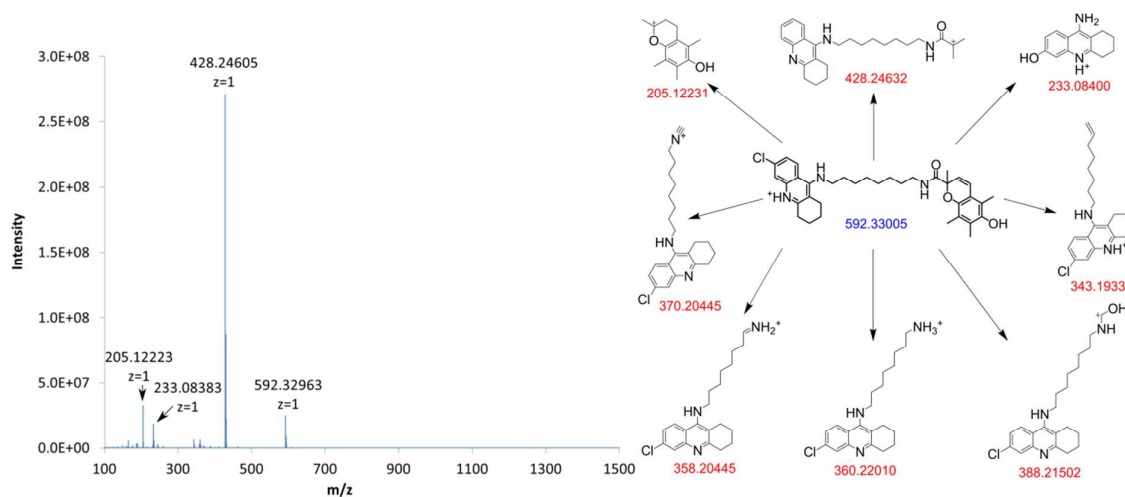

**Figure S2.** Experimental MS/MS spectrum of the parent compound **7u** and suggested chemical structures of the main fragments. The values in the right-hand part of the Figure are calculated  $m/z$ 's. All displayed fragments were observed within  $\pm 0.001$  of  $m/z$  in the experimental MS/MS spectra.

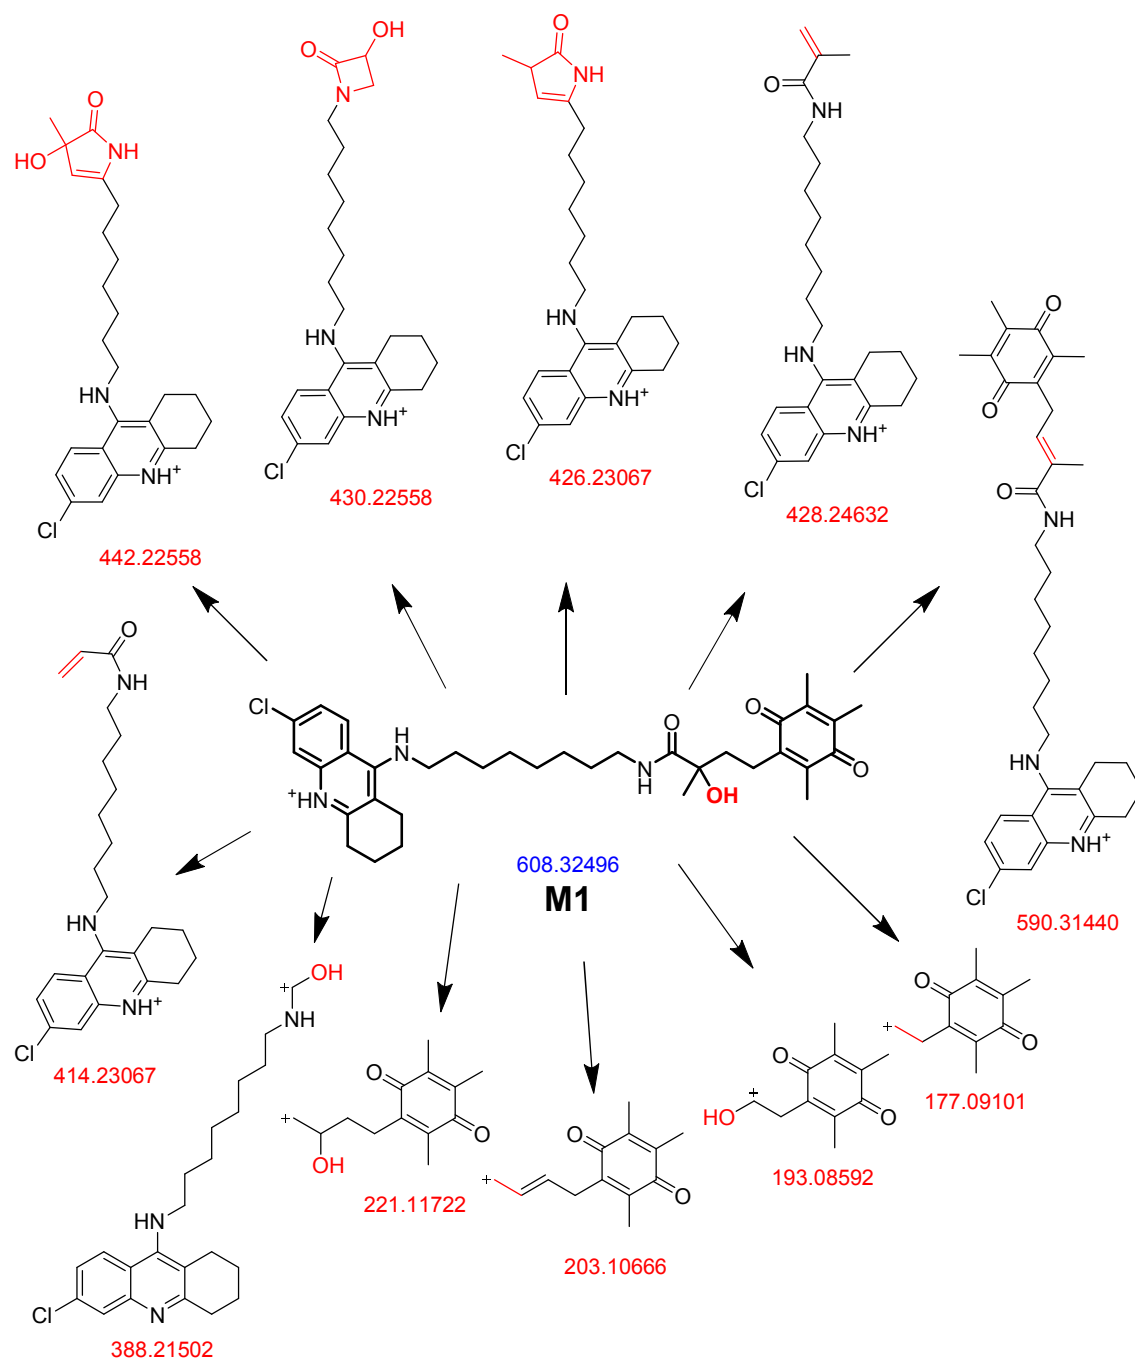

**Figure S3.** Proposed structure of metabolite **M1** and molecular fragments which were found in MS/MS spectra. The displayed  $m/z$ 's are expressed as calculated values corresponding to  $\pm 0.001$  to  $m/z$ 's found in the recorded MS/MS spectra.

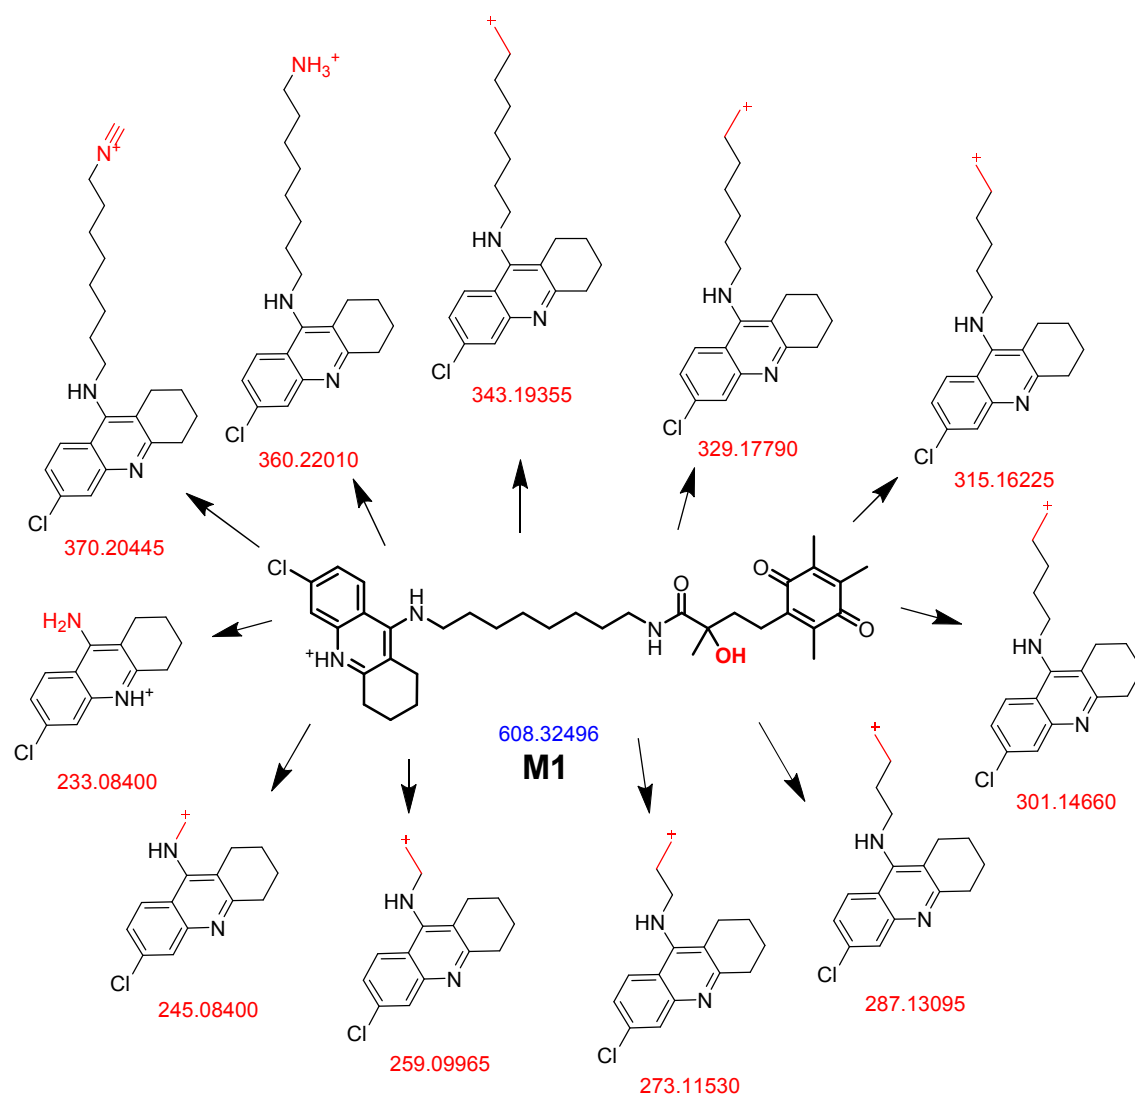

**Figure S4.** Proposed structure of metabolite **M1** and further molecular fragments which were found in MS/MS spectra. The displayed  $m/z$ 's are expressed as calculated values corresponding to  $\pm 0.001$  to  $m/z$ 's found in the recorded MS/MS spectra.

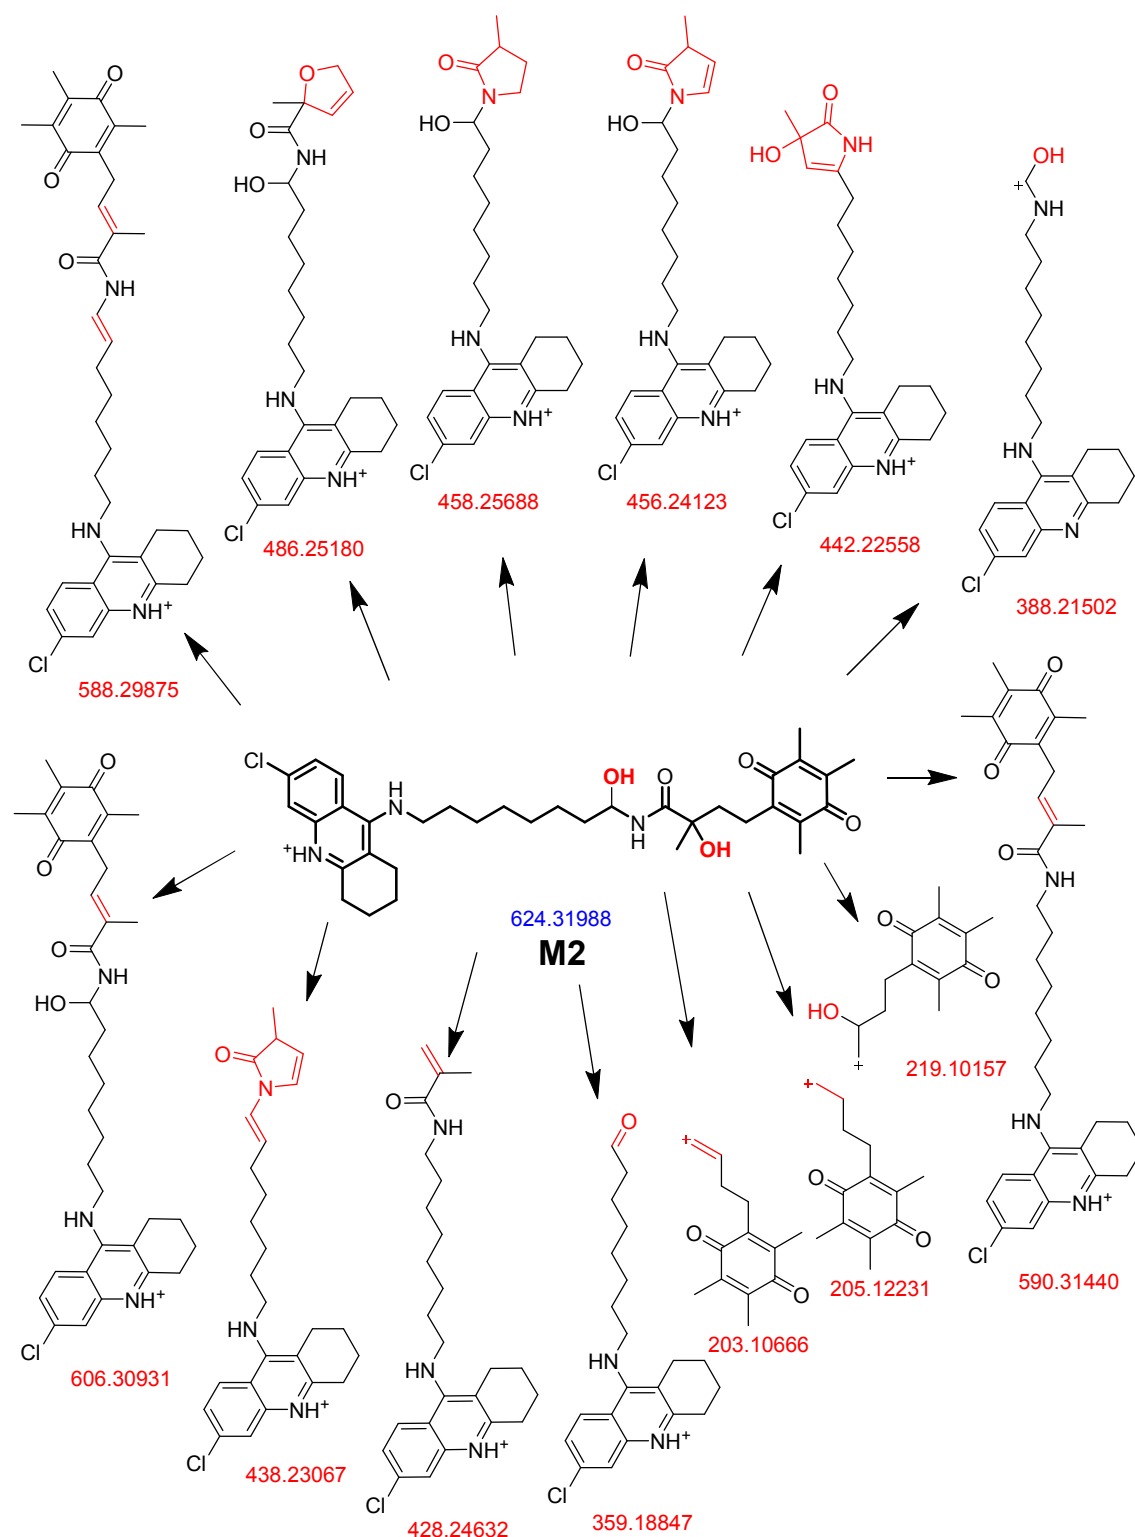

**Figure S5.** Proposed structure of metabolite **M2** and molecular fragments which were found in MS/MS spectra. The displayed  $m/z$ 's are expressed as calculated values corresponding to  $\pm 0.001$  to  $m/z$ 's found in the recorded MS/MS spectra.



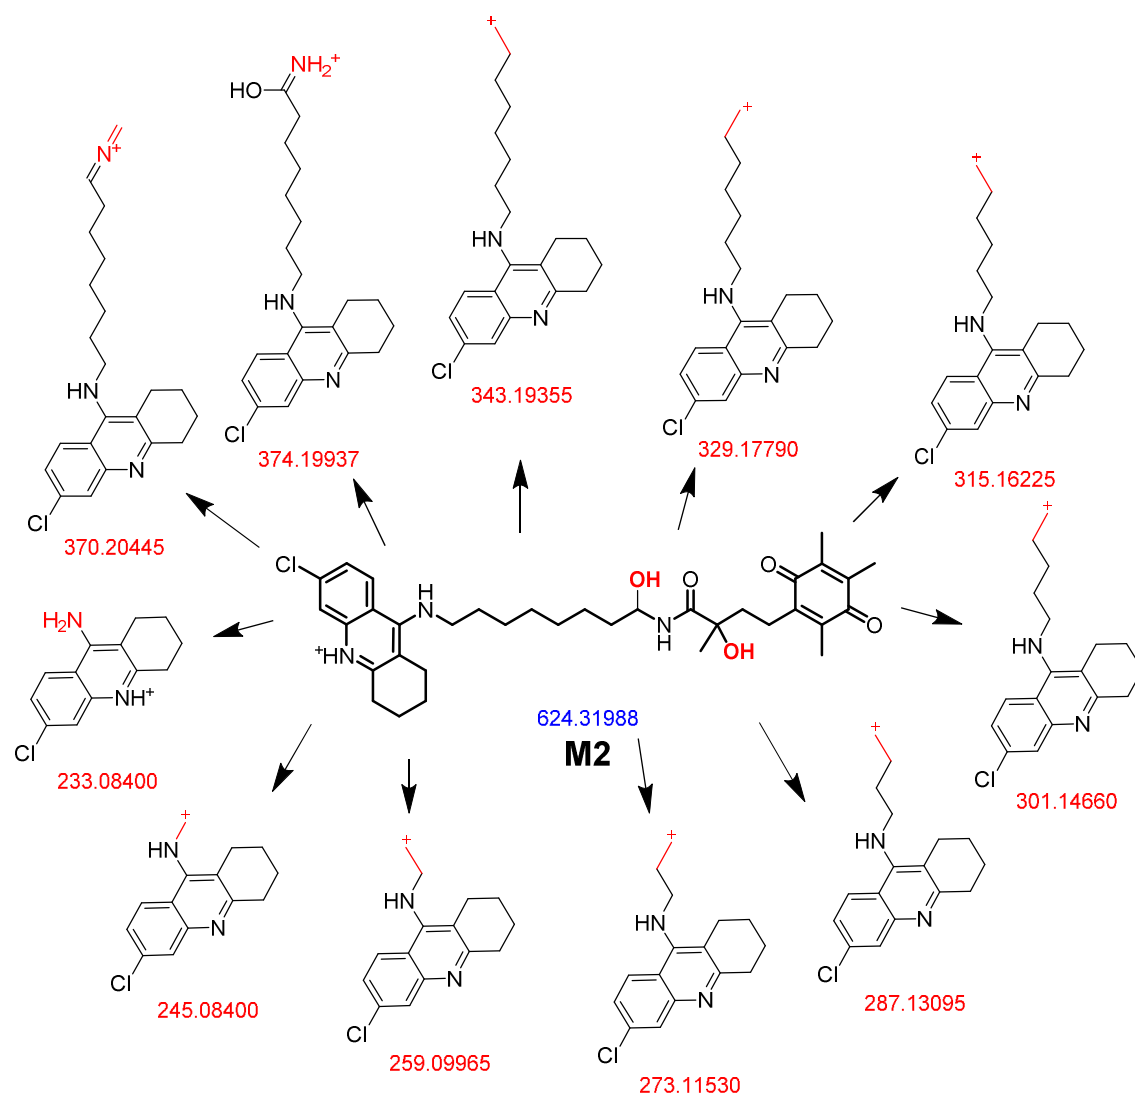

**Figure S6.** Proposed structure of metabolite **M2** and further molecular fragments which were found in MS/MS spectra. The displayed m/z's are expressed as calculated values corresponding to  $\pm 0.001$  to m/z's found in the recorded MS/MS spectra.

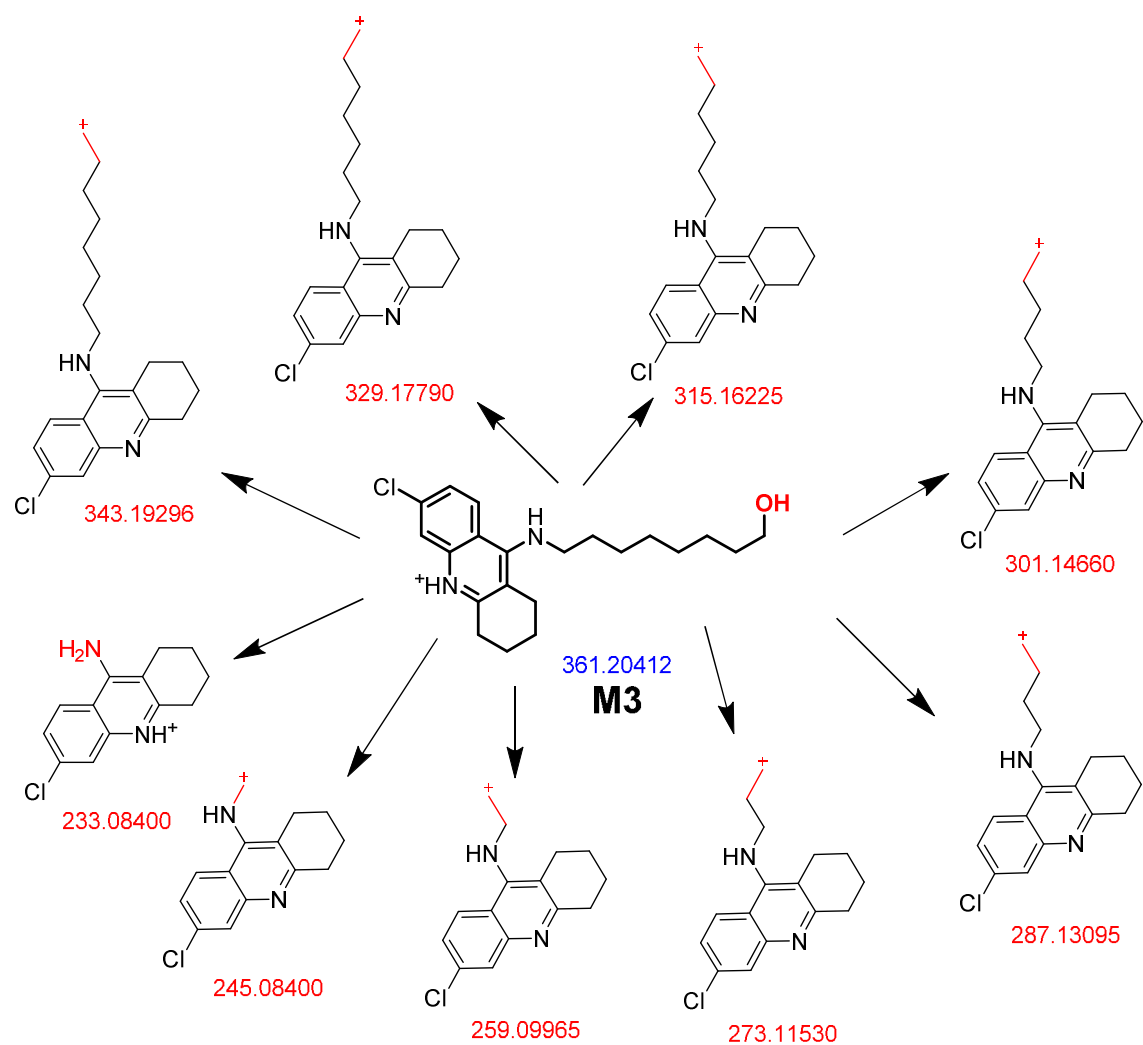

**Figure S7.** Proposed structure of metabolite **M3** and molecular fragments which were found in MS/MS spectra. The displayed  $m/z$ 's are expressed as calculated values corresponding to  $\pm 0.001$  to  $m/z$ 's found in the recorded MS/MS spectra.

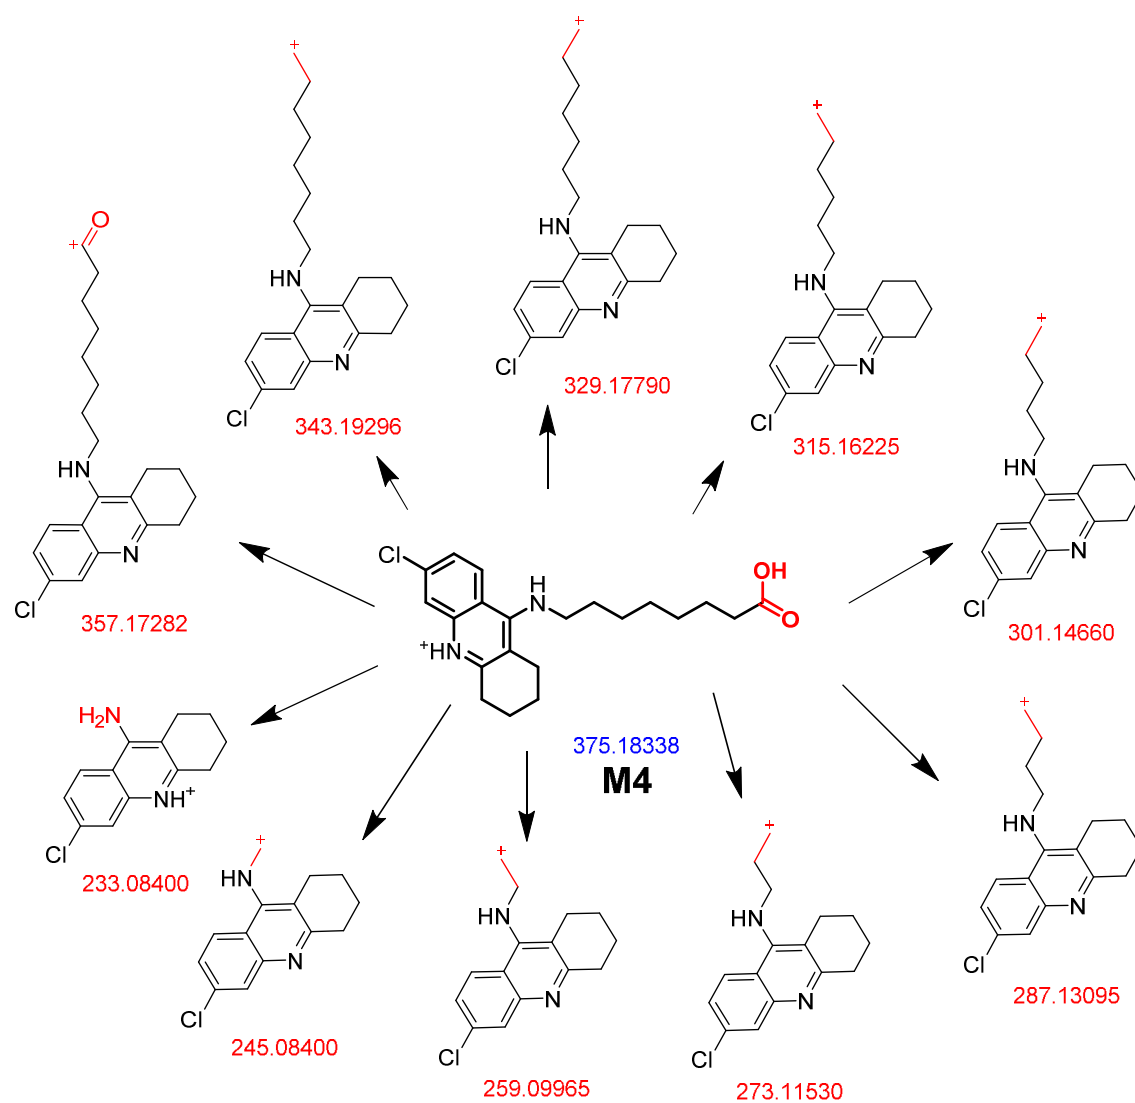

**Figure S8.** Proposed structure of metabolite **M4** and molecular fragments which were found in MS/MS spectra. The displayed  $m/z$ 's are expressed as calculated values corresponding to  $\pm 0.001$  to  $m/z$ 's found in the recorded MS/MS spectra.
